# Supplementary material for: Preclinical Pharmacology of AZD5363, an Inhibitor of AKT: Pharmacodynamics, Antitumor Activity, and Correlation of Monotherapy Activity with Genetic Background
Source: Oxford University Press journal article supplement (doi:10.1158/1535-7163.mct-11-0824-t), 2012-02-01
Supplement: 15357163mct110824t-sup-f3_pdf_84k.pdf [file 15357163mct110824t-sup-f3_pdf_84k.pdf]

# Supplementary Fig. S3

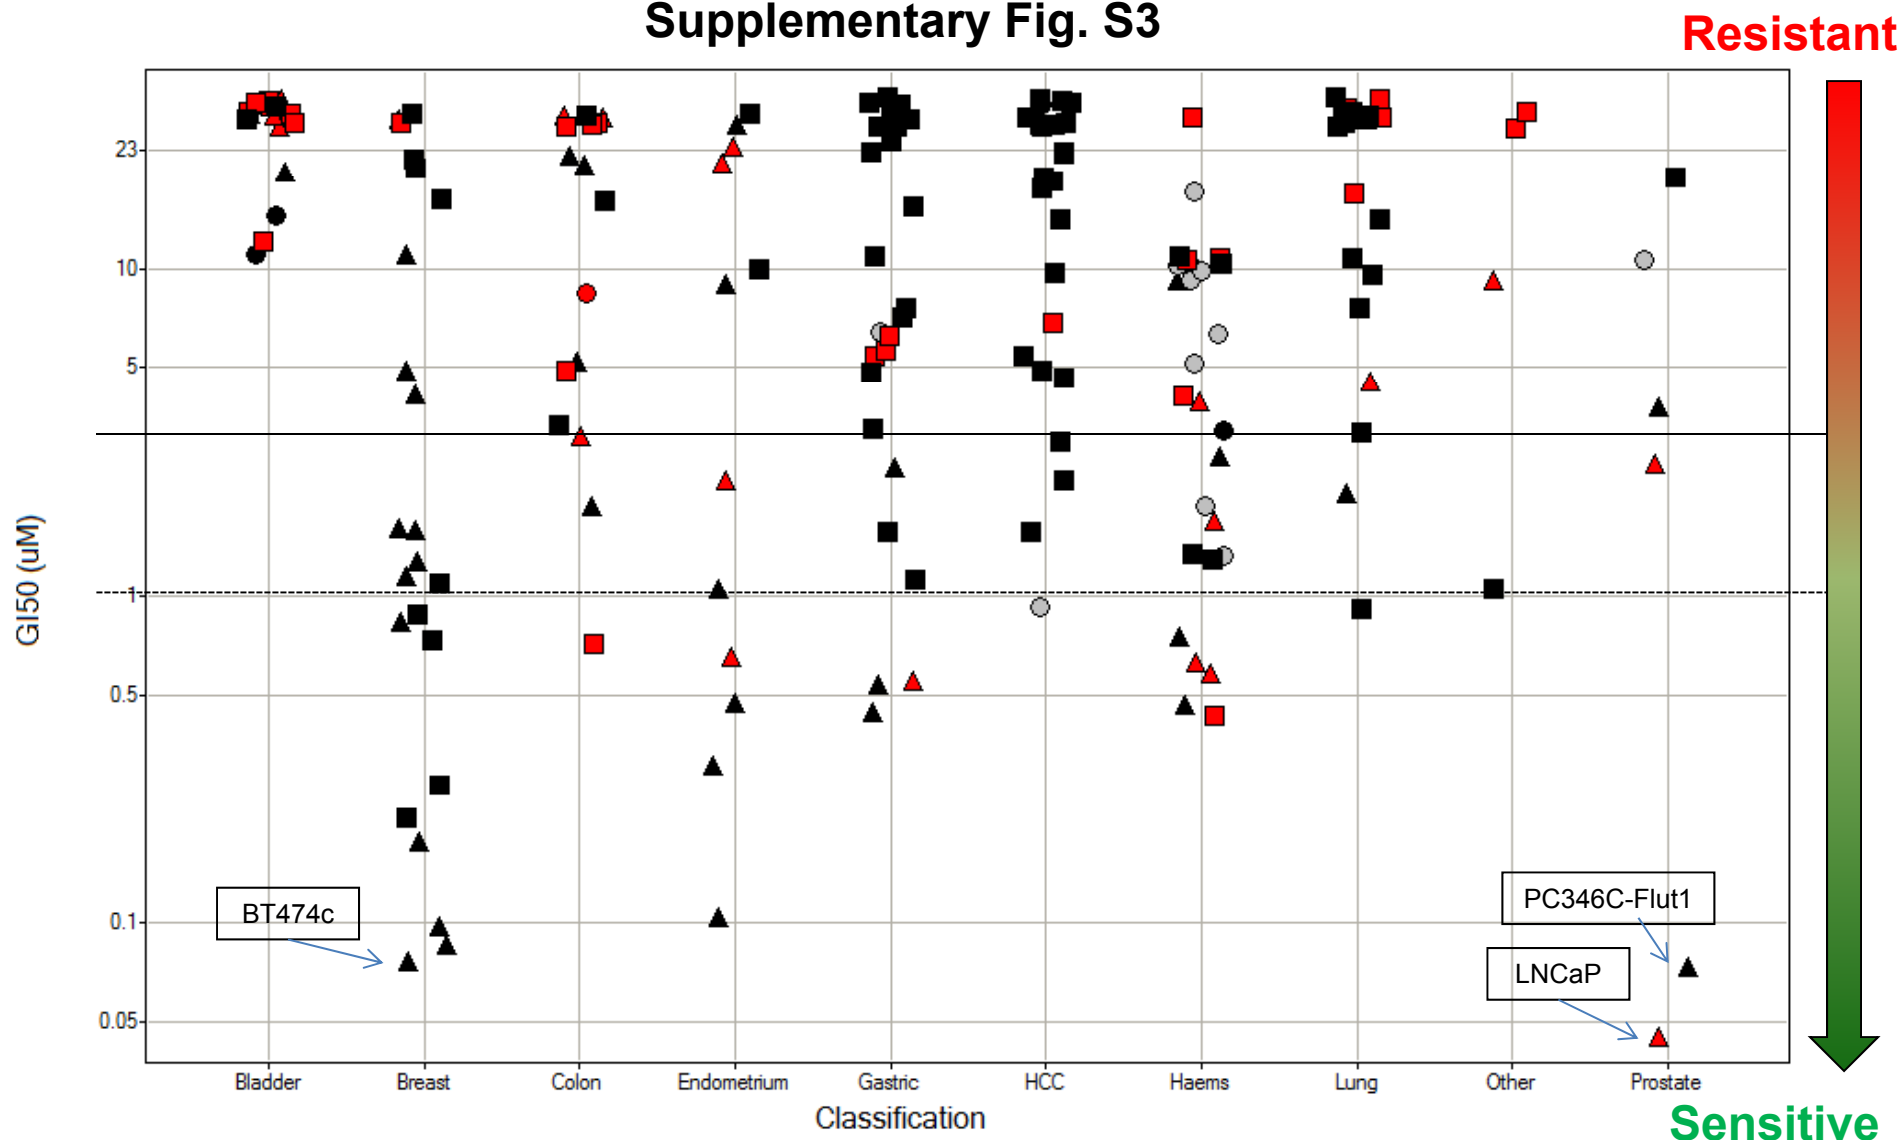

**Colour by RAS mutation status (K-, N- or H-RAS):**

- At least one RAS gene mutant
- All RAS genes wild type
- Not known (includes cell lines where one or two RAS genes may be wild type but others unknown)

**Shape by PIK3CA or PTEN mutation status:**

- PIK3CA and/or PTEN mutant (includes cell lines where one gene is mutant and the other unknown)
- PIK3CA and PTEN wild type
- Status of PIK3CA and/or PTEN unknown (includes cell lines where one gene is confirmed wild type and other unknown)
