# Supplementary material for: Preclinical Pharmacology of AZD5363, an Inhibitor of AKT: Pharmacodynamics, Antitumor Activity, and Correlation of Monotherapy Activity with Genetic Background
Source: Oxford University Press journal article supplement (doi:10.1158/1535-7163.mct-11-0824-t), 2012-02-01
Supplement: 15357163mct110824t-sup-t1_xls_82k.xls [file 15357163mct110824t-sup-t1_xls_82k.xls]

## Sheet: All MTS data
Tumour type	Classification	Cell Line	GI50 (uM)	PIK3CA mutation	PI3K mutation domain	PTEN status	RAS mutations (H N and K)	Origin of cell line	Culture conditions	ID testing method	Date when last ID tested (month- year)
Prostate	Prostate	LNCaP	0.049	wt	wt	mut	wt	ATCC CRL 1740	RPMI + 10% FCS + 2mM L-Glut	STR Analysis	2011-08-01
Breast	Breast	BT-474c	0.07	mut	other	wt	wt	Drs. J Albanell and J Baselga, Laboratorio Ricerca Oncologica, Barcelona, Spain	DMEM + 10%FCS	STR Analysis	2010-12-01
Prostate	Prostate	PC346C-Flut1	0.07	wt	wt	mut	wt	Dr W van Weerden, Erasmus, The Netherlands	DMEM/Hams F12 1:1 + 2 mM L-Glutamine, 0.01% BSA, 2% CS-FCS, 10 ng/mL EGF, 0.5 ug/mL hydrocortisone	STR Analysis	2010-12-01
Breast	Breast	CAMA-1	0.0797	wt	wt	mut	wt	ATCC HTB-21	EMEM + 10%FCS	N/A	N/A
Breast	Breast	ZR-75-1	0.0918	wt	wt	mut	wt	ATCC CRL 1500	RPMI 1640 + 10%FCS + 1%Na Pyruvate	STR Analysis	2010-11-01
Endometrium	Endometrium	MFE-296	0.11	mut	helical	mut	wt	DSMZ ACC 419	40% RPMI/40% EMEM + 20% FCS + 10% M1 + 1X Insulin	STR Analysis	2011-01-01
Breast	Breast	T47D	0.193	mut	kinase	wt	wt	ATCC HTB-133	DMEM + 10%FCS	STR Analysis	2011-07-01
Breast	Breast	HCC1187	0.225	wt	wt	wt	wt	ATCC CRL-2322	RPMI + 10% FCS + 2mM L-Glutamine	STR Analysis	2011-07-01
Breast	Breast	HCC1569	0.246	wt	wt	wt	wt	ATCC	RPMI + 10% FCS + 2mM L-Glutamine	STR Analysis	2011-07-01
Endometrium	Endometrium	Hec6	0.31	wt	wt	mut	wt	JCRB	EMEM+15% FCS + 1% Glutamine	STR Analysis	2011-03-01
AML	Haems	THP-1	0.392	wt	wt	wt	mut	ATCC TIB 202 F-11838	RPMI 1640 + 10%FCS	STR Analysis	2011-03-01
AML	Haems	Jurkat	0.427	wt	wt	mut	wt	DSMZ ACC-282	RPMI 1640 + 10%FCS	STR Analysis	2010-11-01
Gastric	Gastric	HGC-27	0.4452	mut	helical	mut	wt	ECACC 94042256	EMEM + 10%FCS + 1%NEAA + 1% GLUT	STR Analysis	2011-06-01
Endometrium	Endometrium	MFE-280	0.48	mut	kinase	wt	wt	ECACC 98050131	EMEM + 10%FCS	N/A	N/A
Gastric	Gastric	IM95m	0.5097	mut	helical	wt	wt	HSRRB	DMEM+10%FBS+10ug/ml insulin	StemElite ID system kit (Promega, Cat#: G9530)	2011-11-01
MM	Haems	L-363	0.523	mut	helical	wt	mut	DSMZ ACC 49	RPMI 1640 + 10%FCS	N/A	N/A
Gastric	Gastric	AGS	0.5523	mut	helical	wt	mut	Unknown	Hams F12 +10% Heat inactivated serum+1% Glutamine	STR Analysis	2011-06-01
Endometrium	Endometrium	SNG-M	0.64	mut	other	mut	mut	JCRB	HAMS F12+20%FCS + 1% Glutamine	N/A	N/A
NHL	Haems	SC-1	0.642	unknown	unknown	unknown	mut	ATCC CRL-1404	EMEM + 10%FCS + 10%M1	N/A	N/A
Breast	Breast	SUM52PE	0.686	wt	wt	wt	wt	Asterand	HAMS F12 + 5% FCS + 5 ug/ml Insulin + 1 ug/ml Hydrocortisone	STR Analysis	2011-07-01
AML	Haems	Reh	0.705	wt	wt	mut	wt	ATCC CRL-8286 F-10986	RPMI 1640 + 10%FCS	STR Analysis	2011-02-01
Colon	Colon	SW403	0.7639	wt	wt	wt	mut	ATCC CCL 230	L-15 + 10%FCS	N/A	N/A
Breast	Breast	HCC1419	0.815	wt	wt	wt	wt	ATCC CRL2326	RPMI + 10% FCS + 2mM L-Glut	N/A	N/A
Breast	Breast	MDA-MB-468	0.835	wt	wt	mut	wt	ATCC HTB 132	DMEM + 10%FCS	N/A	N/A
HCC	HCC	Hep 3B	0.8576	wt	wt	unknown	not known or not all sequenced	ECACC 86062703 CB 1069	EMEM + 10%FCS + 1%NEAA	STR Analysis	2011-07-01
Lung	Lung	DMS 114	0.9034	wt	wt	wt	wt	ATCC CRL 2066	Waymouth's MB 752/1 medium + 10% FCS + 10% M1	STR Analysis	2011-08-01
Ovary	Other	NIH:OVCAR-3	0.99	wt	wt	wt	wt	ATCC HTB 161 F-10189	RPMI+ 20%FBS + 2mMGlutamine + 10ug/ml Insulin	N/A	N/A
Endometrium	Endometrium	ESS1	1	mut	helical	mut	wt	Unknown	RPMI + 10% FCS + 2mM L-Glut	N/A	N/A
Gastric	Gastric	NCI-N87	1.037	wt	wt	wt	wt	ATCC CRL-5822	RPMI 1640 + 10%FCS + 10%M1	STR Analysis	2011-06-01
Breast	Breast	SK-BR-3	1.18	wt	wt	wt	wt	ATCC HTB 30	RPMI 1640 + 20%FCS	STR Analysis	2011-06-01
MM	Haems	ARH-77	1.25	wt	wt	wt	wt	ATCC HTB 19	DMEM + 10%FCS + 10ug/ml Insulin	STR Analysis	2011-04-01
Breast	Breast	BT-20	1.25	mut	kinase	wt	wt	ECACC 88121201	RPMI 1640 + 10%FCS	STR Analysis	2011-02-01
NHL	Haems	Ramos	1.29	unknown	unknown	unknown	not known or not all sequenced	ECACC 85030802	RPMI 1640 + 10%FCS	STR Analysis	2011-04-01
AML	Haems	MonoMac6	1.32	wt	wt	wt	wt	DSMZ	RPMI 1640 + 10%FCS	N/A	N/A
Breast	Breast	MDA-MB-453	1.35	mut	kinase	mut	wt	ATCC HTB 131	DMEM + 10% FCS + 1% Glut	STR Analysis	2011-07-01
Breast	Breast	MCF-7	1.58	mut	helical	wt	wt	ATCC HTB-22	RPMI + 10% FCS + 2mM L-Glut	STR Analysis	2011-08-01
HCC	HCC	HLE	1.634	wt	wt	wt	wt	JCRB 0404	DMEM + 10% FBS + 10% M1	N/A	N/A
Gastric	Gastric	23132/87	1.671	wt	wt	wt	wt	DSMZ ACC 201	RPMI + 10% FCS + 2mM L-Glut	STR Analysis	2011-06-01
Breast	Breast	HCC1954	1.69	mut	kinase	wt	wt	ATCC	RPMI + 10% FCS + 2mM L-Glut	STR Analysis	2011-02-01
NHL	Haems	JVM-3	1.834	unknown	unknown	unknown	mut	DSMZ ACC 18	RPMI + 10% FBS + 10% M1	STR Analysis	2011-04-01
Colon	Colon	HRA19	1.91	mut	helical	unknown	wt	CRUK	Iscoves + 10%FCS +10%M1	STR Analysis	2011-08-01
MM	Haems	MOLP-8	1.93	unknown	unknown	unknown	not known or not all sequenced	DSMZ ACC 569	RPMI 1640 + 20%FCS	STR Analysis	2011-06-01
Endometrium	Endometrium	Hec59	2.11	wt	wt	mut	mut	JCRB	EMEM+15% FCS + 1% Glutamine	STR Analysis	2011-03-01
Lung	Lung	NCI-H1975	2.261	mut	other	wt	wt	ATCC CRL 5908	RPMI 160 + 10% FCS + 2mM Glutamine	STR Analysis	2011-09-01
Gastric	Gastric	MKN1	2.421	mut	helical	wt	wt	HSRRB	RPMI1640+10%FBS	StemElite ID system kit	2010-10-01
HCC	HCC	HCCC9810	2.424	wt	wt	wt	wt	SIBS	DMEM+10%FBS	StemElite ID system kit	2010-11-01
Prostate	Prostate	22Rv1	2.52	mut	helical	mut	mut	ATCC CRL-2505	RPMI 1640 + 10%FCS + 10%M1	STR Analysis	2011-06-01
HCC	HCC	HuH-1	2.728	wt	wt	wt	wt	JCRB HSRB0021	DMEM + 10% FBS + 10% m1	N/A	N/A
NHL	Haems	U937	2.78	wt	wt	mut	wt	ATCC CRL-1593.2	RPMI 1640 + 10%FCS	N/A	N/A
Lung	Lung	NCI-H526	2.871	wt	wt	wt	wt	ATCC CRL-5811	RPMI 1640 + 10%FCS + 10%M1	N/A	N/A
MM	Haems	JJN-3	2.945	unknown	unknown	unknown	wt	DSMZ ACC 541	DMEM/ISCOVES (1:1) + 20% FCS	STR Analysis	2011-04-01
Colon	Colon	SW948	3.2	mut	helical	wt	mut	ATCC CCL-237	L-15 + 10%FCS	STR Analysis	2011-06-01
Gastric	Gastric	SNU-620	3.384	wt	wt	wt	wt	Unknown	RPMI + 10% HI FCS + 10% M1	STR Analysis	2011-06-01
AML	Haems	OCI-AML2	3.57	unknown	unknown	unknown	mut	DSMZ ACC 99	RPMI + 10% FCS + 2mM L-Glut	STR Analysis	2011-06-01
Colon	Colon	SW48	3.628	wt	wt	wt	wt	ATCC CCL-231	L-15 + 10%FCS	STR Analysis	2011-01-01
Breast	Breast	KPL-4	4	mut	kinase	wt	wt	Unknown	RPMI + 10% FBS + 10% M1	STR Analysis	2010-12-01
Prostate	Prostate	PC3	4.002	wt	wt	mut	wt	ATCC CRL 1435	Hams F12K + 10% FCS + 2mM Glut	N/A	N/A
Lung	Lung	NCI-H460	4.208	mut	helical	unknown	mut	ATCC HTB-177	RPMI + 10% FBS + 10% M1	STR Analysis	2011-06-01
MM	Haems	RPMI-8226	4.208	wt	wt	wt	mut	ATCC CCL-155	RPMI 1640 + 20%FCS	N/A	N/A
Breast	Breast	HCC1395	4.4	wt	wt	mut	wt	ATCC	RPMI + 10% FCS + 2mM L-Glut	STR Analysis	2011-03-01
Gastric	Gastric	SNU-638	4.523	wt	wt	wt	wt	Unknown	RPMI + 10% HI FCS + 10% M1	STR Analysis	2011-06-01
Colon	Colon	LoVo	4.746	wt	wt	wt	mut	ECACC CCL 229	Phenol free RPMI +10% FCS + 1% Glutamine	STR Analysis	2011-08-01
AML	Haems	Molm 16	4.75	unknown	unknown	unknown	not known or not all sequenced	DSMZ ACC 555	RPMI + 20% FCS + 20% vol cond med 5637	STR Analysis	2011-09-01
HCC	HCC	BEL7404	4.792	wt	wt	wt	wt	SIMM and Beijing	RPMI1640+10%FBS	StemElite ID system kit	2010-11-01
HCC	HCC	MHCC97	4.901	wt	wt	wt	wt	Zhongshan Hospital	DMEM+10%FBS	StemElite ID system kit	2010-10-01
Gastric	Gastric	SNU-1	5.258	wt	wt	wt	mut	Unknown	RPMI + 10% HI FCS + 10% M1	STR Analysis	2011-02-01
Colon	Colon	RKO	5.294	mut	kinase	wt	wt	ATCC CRL-2577	RPMI + 10% FCS + 2mM L-Glut	STR Analysis	2011-06-01
HCC	HCC	BEL7405	5.607	wt	wt	wt	wt	SIBS	DMEM+10%FBS	StemElite ID system kit	2010-09-01
Gastric	Gastric	SNU-601	5.938	wt	wt	wt	mut	Unknown	RPMI 10% HI Serum + 10% M1	STR Analysis	2011-06-01
Gastric	Gastric	SNU-668	6.003	wt	wt	wt	mut	Unknown	RPMI + 10% HI FCS + 10% M1	STR Analysis	2011-02-01
Gastric	Gastric	Hs746T	6.084	wt	wt	unknown	not known or not all sequenced	ATCC HTB 135	DMEM + 10%FCS + 1%NEAA + 1%Na Pyruvate	STR Analysis	2011-09-01
NHL	Haems	JEKO-1	6.439	unknown	unknown	unknown	not known or not all sequenced	DSMZ ACC 553	RPMI 1640 + 20%FCS	STR Analysis	2011-09-01
Gastric	Gastric	KATOIII	7.267	wt	wt	wt	wt	ECACC 86093004	RPMI 1640 + 10%FCS	STR Analysis	2011-06-01
Gastric	Gastric	SNU-484	7.392	wt	wt	wt	wt	Unknown	RPMI + 10% HI FCS + 10% M1	STR Analysis	2011-01-01
HCC	HCC	Hep G2	7.418	wt	wt	wt	mut	ECACC 85011430	EMEM + 10%FCS + 1%NEAA + 1%Na Pyruvate	STR Analysis	2011-06-01
Lung	Lung	NCI-H1703	8.045	wt	wt	wt	wt	ATCC CRL-5889	RPMI 1640 + 10%FCS + 10%M1	STR Analysis	2011-06-01
Colon	Colon	HCT-8	8.076	unknown	unknown	wt	mut	ECACC90032006	RPMI 1640 + 10%DHS	STR Analysis	2011-02-01
Endometrium	Endometrium	Hec116	8.52	wt	wt	mut	wt	JCRB	EMEM+15% FCS + 1% Glutamine	N/A	N/A
Lung	Lung	NCI-H1793	9.474	wt	wt	wt	wt	ATCC HTB 72	Phenol free RPMI +10% FCS + 1% Glutamine	N/A	N/A
Melanoma	Other	A2058	9.67	wt	wt	mut	mut	Applied Cell Sciences	DMEM + 10%FCS	N/A	N/A
HCC	HCC	SNU-354	9.774	wt	wt	wt	wt	KCLB	RPMI1640+10%FBS	StemElite ID system kit	2009-12-01
AML	Haems	CMK	10	wt	wt	wt	wt	ATCC CCL 86	RPMI + 10% FCS + 2mM L-Glut	STR Analysis	2011-07-01
AML	Haems	K-562	10	wt	wt	wt	wt	DSMZ ACC 497	RPMI + 10% FCS + 2mM L-Glut	N/A	N/A
AML	Haems	KG-1	10	wt	wt	wt	mut	ATCC CRL-1432	RPMI+10%fcs+1%glutamine	N/A	N/A
NHL	Haems	MEC-1	10	unknown	unknown	unknown	not known or not all sequenced	DSMZ ACC 528	RPMI + 10% FCS + 2mM L-Glut	N/A	N/A
NHL	Haems	NAMALWA	10	unknown	unknown	unknown	not known or not all sequenced	DSMZ ACC 575	RPMI 1640 + 10%FCS	STR Analysis	2011-05-01
AML	Haems	Nomo-1	10	wt	wt	wt	mut	ECACC 86111306	RPMI + 10% FCS + 2mM L-Glut	N/A	N/A
NHL	Haems	OCI-LY-19	10	unknown	unknown	unknown	not known or not all sequenced	DSMZ ACC 542	RPMI 1640 + 10%FCS	STR Analysis	2011-04-01
NHL	Haems	Raji	10	wt	wt	mut	wt	DSMZ ACC 392	RPMI+10%fcs+1%glutamine	N/A	N/A
NHL	Haems	WSU DLCL2	10	unknown	unknown	unknown	not known or not all sequenced	Paterson Institute for Cancer Research	RPMI 1640 + 10%FCS	STR Analysis	2011-01-01
Prostate	Prostate	VCaP	10.22	unknown	unknown	unknown	not known or not all sequenced	ATCC CRL-2876	DMEM + 10% FBS + 10% m1	STR Analysis	2011-09-01
Lung	Lung	NCI-H1869	10.3	wt	wt	wt	wt	ATCC CRL-5900	ACL4	N/A	N/A
Breast	Breast	HCC1937	10.4	wt	wt	mut	wt	ATCC CRL-2336	RPMI + 10% FCS + 2mM L-Glut	STR Analysis	2011-01-01
Endometrium	Endometrium	MESSA	10.5	wt	wt	wt	wt	ECACC 95051030	McCoy's 5a + 10% FCS	N/A	N/A
Bladder	Bladder	SW-1710	10.87	wt	wt	wt	mut	DSMZ ACC426	85% RPMI + 15% FBS	N/A	N/A
Gastric	Gastric	SNU-16	11.1	wt	wt	wt	wt	Unknown	RPMI + 10% HI FCS + 10% M1	STR Analysis	2011-06-01
Bladder	Bladder	97-7	12.06	wt	wt	unknown	wt	Dr Margaret Knowles, University of Leeds, UK	RPMI + 10% HI FCS + 10% M1	STR Analysis	2010-12-01
Bladder	Bladder	MGH-U3	13.51	wt	wt	unknown	wt	Unknown	EMEM + 10%FCS + 10%M1	STR Analysis	2011-06-01
Gastric	Gastric	OCUM-1	14.52	wt	wt	wt	wt	HSRRB	DMEM+1% Soudium Pyruvate+10%FBS	StemElite ID system kit	2010-10-01
Lung	Lung	NCI-H1437	14.73	wt	wt	wt	wt	ATCC CRL-5872	RPMI + 10% FCS + 2mM L-Glut	N/A	N/A
HCC	HCC	MHCC97-H	15.46	wt	wt	wt	wt	Zhongshan Hospital	DMEM+10%FBS	StemElite ID system kit	2010-11-01
Breast	Breast	MDA-MB-436	16.1	wt	wt	wt	wt	Unknown	RPMI + 10% FCS + 2mM L-Glut	STR Analysis	2010-11-01
Colon	Colon	COLO 205	16.66	wt	wt	wt	wt	ECACC CCL 222	RPMI 1640 + 10%FCS	STR Analysis	2010-11-01
HCC	HCC	SNU-878	16.7	wt	wt	wt	wt	KCLB	RPMI1640+10%FBS	StemElite ID system kit	2010-09-01
HCC	HCC	HuH-7	16.75	wt	wt	wt	wt	Riken cell bank, RCB1366	DMEM + 10% FCS	STR Analysis	2011-06-01
Bladder	Bladder	HT-1376	18.49	wt	wt	mut	wt	ATCC CRL-1472	EMEM + 10%FCS + 1%NEAA + 1% GLUT	STR Analysis	2011-01-01
Lung	Lung	HX147	18.52	wt	wt	wt	mut	Dr Duchesne, ICRF Sutton Working Bank	RPMI + 10% FCS + 2mM L-Glut	N/A	N/A
MM	Haems	AMO-1	18.86	unknown	unknown	unknown	not known or not all sequenced	DSMZ ACC 538	RPMI 1640 + 20%FCS	STR Analysis	2011-05-01
Endometrium	Endometrium	AN3CA	19.1	wt	wt	mut	mut	ATCC	EMEM + 10%FCS	STR Analysis	2011-05-01
Prostate	Prostate	DU-145	20.09	wt	wt	wt	wt	Applied Cell Sciences	EMEM + 10%FCS + 1%NEAA	STR Analysis	2011-04-01
Colon	Colon	SK-CO-1	20.19	mut	kinase	wt	wt	ATCC HTB 39	DMEM + 10%FCS	N/A	N/A
Breast	Breast	BT-549	20.6	wt	wt	wt	wt	ATCC	RPMI+10%FCS+1%L-Glut..	N/A	N/A
Breast	Breast	MDA-MB-157	20.9	wt	wt	wt	wt	ATCC HTB 24	RPMI + 10% FCS + 2mM L-Glut	STR Analysis	2010-11-01
HCC	HCC	SNU-398	20.9	wt	wt	wt	wt	ATCC CRL-2233	RPMI 1640 + 10%FBS	STR Analysis	2011-06-01
Gastric	Gastric	NUGC-3	21.87	wt	wt	wt	wt	Beijing University	RPMI1640 + 10%FBS	StemElite ID system kit	2010-11-01
Colon	Colon	HT-29	22.59	mut	other	wt	wt	ECACC 85061109	RPMI + 10% FCS + 2mM L-Glut	N/A	N/A
HCC	HCC	MHCC97-L	22.73	wt	wt	wt	wt	Zhongshan Hospital	DMEM+10%FBS	StemElite ID system kit	2010-11-01
HCC	HCC	SNU-368	22.74	wt	wt	wt	wt	KCLB	RPMI1640+10%FBS	StemElite ID system kit	2009-12-01
Endometrium	Endometrium	Hec-1B	24	unknown	unknown	unknown	mut	ATCC HTB-113	EMEM + 10%FCS + 1%NEAA + 1%Na Pyruvate	N/A	N/A
Gastric	Gastric	AZ-521	25.45	wt	wt	wt	wt	HSRRB	RPMI1640+10%FBS	StemElite ID system kit	2011-08-01
Colon	Colon	LS 180	26.11	wt	wt	wt	mut	ECACC CCL 187	EMEM + 10%FCS + 1%NEAA	STR Analysis	2011-01-01
Bladder	Bladder	UM-UC-3	26.4	wt	wt	mut	mut	ATCC CRL-1749	EMEM + 10%FCS + 1%NEAA + 1% GLUT	N/A	N/A
Lung	Lung	A549	28.7	wt	wt	wt	mut	ATCC CCL 185	RPMI + 10% FCS + 2mM L-Glut	STR Analysis	2010-12-01
Colon	Colon	COLO 320DM	29.52	wt	wt	wt	wt	ECACC 87061205	RPMI + 10% FCS + 2mM L-Glut	STR Analysis	Frb-11
Bladder	Bladder	5637	30	wt	wt	wt	mut	ATCC CRL 1473	EMEM + 10%FCS	STR Analysis	2011-01-01
Bladder	Bladder	1A6	30	wt	wt	wt	mut	DSMZ ACC-400	RPMI1640+10%FBS	STR Analysis	2011-04-01
Bladder	Bladder	647-V	30	wt	wt	wt	mut	ATCC HTB-5	EMEM + 10%FCS + 1%NEAA + 1% GLUT	N/A	N/A
HCC	HCC	BEL7402	30	wt	wt	wt	wt	ATCC HTB-1	RPMI1640+10%FBS	STR Analysis	2011-04-01
Bladder	Bladder	BFTC905	30	wt	wt	wt	mut	Unknown	RPMI 1640 + 10%FCS	STR Analysis	2011-04-01
Gastric	Gastric	BGC823	30	wt	wt	wt	wt	DSMZ ACC-395	RPMI + 10% FBS + 10% M1	N/A	N/A
Lung	Lung	Calu-1	30	wt	wt	wt	wt	ECACC 99040201	RPMI1640+10%FBS	STR Analysis	2011-01-01
Lung	Lung	Calu-3	30	wt	wt	wt	mut	Zhongshan Hospital	DMEM+10%FBS	StemElite ID system kit	2009-12-01
Colon	Colon	CCK-81	30	mut	other	wt	wt	ATCC CCL 225	RPMI 1640 + 10%FCS	N/A	N/A
Endometrium	Endometrium	EFE-184	30	wt	wt	wt	wt	ATCC CCL 247	Phenol free RPMI +10% FCS + 1% Glutamine	STR Analysis	2011-08-01
Gastric	Gastric	GTL16	30	wt	wt	wt	wt	DSMZ ACC 589	RPMI1640+10%FBS	STR Analysis	2010-11-01
Breast	Breast	HCC1806	30	wt	wt	wt	wt	Japan Health Foundation	DMEM + 10% FBS + 10% m1	N/A	N/A
HCC	HCC	HCCLM3	30	wt	wt	unknown	wt	Paterson Institute for Cancer Research	RPMI1640+10%FBS	STR Analysis	2010-12-01
Colon	Colon	HCT 116	30	mut	kinase	wt	mut	CNRS-Institut Curie	RPMI1640+10%FBS	N/A	N/A
Colon	Colon	HCT-15	30	mut	helical	wt	mut	ATCC CRL-2742	RPMI1640+10%FBS	N/A	N/A
HCC	HCC	HLF	30	wt	wt	wt	wt	DSMZ ACC-414	RPMI1640+10%FBS	N/A	N/A
Bladder	Bladder	HT-1197	30	mut	helical	mut	mut	ECACC 85061106	RPMI1640+10%FBS	STR Analysis	2011-02-01
MM	Haems	IM-9	30	wt	wt	wt	mut	DSMZ ACC-414	80-90% RPMI + 10-20% FBS	N/A	N/A
Endometrium	Endometrium	Ishikawa	30	wt	wt	mut	wt	Applied Cell Sciences	RPMI1640+10%FBS	STR Analysis	2011-08-01
Bladder	Bladder	J82	30	mut	other	mut	mut	ATCC CCL-231	RPMI1640+10%FBS	STR Analysis	2011-09-01
Breast	Breast	JIMT-1	30	mut	other	wt	not known or not all sequenced	ECACC CCL 227	RPMI1640+10%FBS	STR Analysis	2011-01-01
Bladder	Bladder	KU-19-19	30	wt	wt	mut	mut	ECACC CCL 159	RPMI1640+10%FBS	STR Analysis	2010-11-01
Breast	Breast	MDA-MB-231	30	wt	wt	wt	mut	ATCC HTB 55	Phenol free RPMI +10% FCS + 1% Glutamine	STR Analysis	2011-03-01
Pancreas	Other	MiaPaCa2	30	wt	wt	wt	mut	ATCC CRL 5803	RPMI1640+10%FBS	STR Analysis	2011-02-01
Gastric	Gastric	MKN74	30	wt	wt	wt	wt	ATCC CRL-5939	RPMI1640+10%FBS	STR Analysis	2011-03-01
Lung	Lung	NCI-H1299	30	wt	wt	wt	mut	ATCC CRL-5800	RPMI1640+10%FBS	N/A	N/A
Lung	Lung	NCI-H2085	30	wt	wt	wt	wt	ATCC CRL 5807	RPMI1640+10%FBS	STR Analysis	2011-02-01
Lung	Lung	NCI-H2126	30	wt	wt	wt	wt	ECACC 85062806	RPMI1640+10%FBS	STR Analysis	2011-08-01
Lung	Lung	NCI-H226	30	wt	wt	wt	wt	ECACC 87092802	RPMI1640+10%FBS	STR Analysis	2011-03-01
Lung	Lung	NCI-H2291	30	wt	wt	wt	mut	ATCC CRL-2169	RPMI1640+10%FBS	STR Analysis	2011-04-01
Lung	Lung	NCI-H23	30	wt	wt	wt	mut	Unknown	RPMI1640+10%FBS	STR Analysis	2010-12-01
Lung	Lung	NCI-H322	30	wt	wt	wt	wt	ATCC CRL-2325	RPMI + 10% FCS + 2mM L-Glut	STR Analysis	2011-06-01
Lung	Lung	NCI-H358	30	wt	wt	wt	mut	DSMZ	RPMI1640+10%FBS	N/A	N/A
Lung	Lung	NCI-H522	30	wt	wt	wt	wt	Beijing Tumor Hospital	RPMI1640+10%FBS	StemElite ID system kit	2011-04-01
Lung	Lung	NCI-H838	30	wt	wt	wt	wt	Unknown	RPMI1640+10%FBS	STR Analysis	2011-09-01
Gastric	Gastric	NUGC-4	30	wt	wt	wt	wt	HSRRB	RPMI1640+10%FBS	StemElite ID system kit	2011-08-01
Gastric	Gastric	PAMC82	30	wt	wt	wt	wt	HSRRB	RPMI1640 + 10%FBS	StemElite ID system kit	2010-11-01
Pancreas	Other	PANC1	30	wt	wt	wt	mut	Beijing Tumor Hospital	RPMI1640+10%FBS	StemElite ID system kit	2011-04-01
Lung	Lung	PC9	30	wt	wt	wt	wt	Unknown	RPMI1640+10%FBS	STR Analysis	2011-06-01
HCC	HCC	QGY7701	30	wt	wt	wt	wt	ATCC CRL-5973	RPMI1640+10%FBS	STR Analysis	2011-06-01
HCC	HCC	QGY7703	30	wt	wt	wt	wt	SIMM	RPMI1640+10%FBS	StemElite ID system kit	2009-12-01
Bladder	Bladder	RT-112	30	wt	wt	wt	mut	JCRB 0404	DMEM +5% FCS +1% Glutamine	N/A	N/A
Bladder	Bladder	RT4	30	wt	wt	wt	mut	SIBS	RPMI1640 + 10%FBS	StemElite ID system kit	2009-12-01
Bladder	Bladder	SCaBER	30	wt	wt	wt	wt	SIBS	DMEM +10%FBS	StemElite ID system kit	2009-12-01
HCC	HCC	SK-HEP-1	30	wt	wt	wt	wt	KCLB	RPMI1640+10%FBS	StemElite ID system kit	2009-12-01
HCC	HCC	SMMC-7721	30	wt	wt	wt	wt	KCLB	RPMI1640+10%FBS	StemElite ID system kit	2009-12-01
Gastric	Gastric	SNU-216	30	wt	wt	wt	wt	KCLB	RPMI1640+10%FBS	StemElite ID system kit	2010-09-01
HCC	HCC	SNU-449	30	wt	wt	wt	wt	SIMM	RPMI1640+10%FBS	StemElite ID system kit	2010-11-01
Gastric	Gastric	SNU-5	30	wt	wt	wt	wt	ATCC HTB-52	RPMI1640+10%FBS	STR Analysis	2010-06-01
HCC	HCC	SNU-739	30	wt	wt	wt	wt	ATCC CRL-2234	RPMI1640+10%FBS	STR Analysis	2011-04-01
HCC	HCC	SNU-761	30	wt	wt	wt	wt	ATCC HTB 54	RPMI + 10% FBS + 10% M1	STR Analysis	2010-11-01
HCC	HCC	SNU-886	30	wt	wt	wt	wt	ATCC CRL-5921	RPMI1640+10%FBS	N/A	N/A
Colon	Colon	SW480	30	wt	wt	wt	mut	ATCC CCL-256	RPMI1640+10%FBS	N/A	N/A
Colon	Colon	SW620	30	wt	wt	wt	mut	Prof Yano, University of Tokushima, Japan	RPMI1640+10%FBS	STR Analysis	2011-07-01
Bladder	Bladder	SW-780	30	wt	wt	wt	wt	ATCC CRL-5806	RPMI1640+10%FBS	STR Analysis	2011-07-01
Bladder	Bladder	T24	30	mut	other	mut	mut	ATCC CRL-5810	RPMI1640+10%FBS	STR Analysis	2011-01-01
Bladder	Bladder	TCCSUP	30	mut	helical	mut	mut	ATCC CRL 5899	RPMI1640+10%FBS	STR Analysis	2010-11-01
Bladder	Bladder	VM-CUB-1	30	mut	helical	mut	mut	Akiko Hiraide from Preclinical Sciences, R&D, AZ Japan	RPMI1640+10%FBS	STR Analysis	2011-08-01
